# Supplementary material for: Validation and Clinical Applications of a Comprehensive Next Generation Sequencing System for Molecular Characterization of Solid Cancer Tissues
Source: PubMed Central journal article supplement (PMC6798036; doi:10.3389/fmolb.2019.00082), 2019-09-25
Supplement: Data_Sheet_1.pdf [file Data_Sheet_1.pdf]

Table S1A. Samples used for assessing the performance of OCP assay for detection of SNVs and Indels

| Validation                    | Number of Samples | Sample Name               | Sample Type |
|-------------------------------|-------------------|---------------------------|-------------|
| <b>LLOD</b>                   | 6                 | Hotspot ladder 6 (47.9%)  | FFPE        |
|                               |                   | Hotspot ladder 5 (29.46%) | FFPE        |
|                               |                   | Hotspot ladder 4 (18.44%) | FFPE        |
|                               |                   | Hotspot ladder 3 (11.04%) | FFPE        |
|                               |                   | Hotspot ladder 2 (5.36%)  | FFPE        |
|                               |                   | Hotspot ladder 1 (2.75%)  | FFPE        |
| <b>Analytical sensitivity</b> | 31                | B903060                   | FFPE        |
|                               |                   | B903061                   | FFPE        |
|                               |                   | B903062                   | FFPE        |
|                               |                   | B903063                   | FFPE        |
|                               |                   | B903067                   | FFPE        |
|                               |                   | MultiMix A                | FFPE        |
|                               |                   | MultiMix B                | FFPE        |
|                               |                   | MultiMix C                | FFPE        |
|                               |                   | MultiMix D                | FFPE        |
|                               |                   | MultiMix E                | FFPE        |
|                               |                   | MultiMix F                | FFPE        |
|                               |                   | MultiMix G                | FFPE        |
|                               |                   | MultiMix H                | FFPE        |
|                               |                   | Quantitative Multiplex    | FFPE        |
|                               |                   | Cancer Hotspot Control    | FFPE        |
|                               |                   | EGFR Multiplex            | FFPE        |
|                               |                   | CDX211                    | frozen      |
|                               |                   | CDX204                    | frozen      |
|                               |                   | CDX248                    | FFPE        |
|                               |                   | CDX249                    | FFPE        |
|                               |                   | CDX256                    | FFPE        |
|                               |                   | CDX268                    | FFPE        |
|                               |                   | CDX270                    | FFPE        |
|                               |                   | CDX281                    | FFPE        |
| CDX318                        | FFPE              |                           |             |
| CDX323                        | FFPE              |                           |             |
| CDX251                        | frozen            |                           |             |
| CDX326                        | FFPE              |                           |             |
| RM8398                        | DNA               |                           |             |
| Hotspot Ladder 6 (47.9%)      | FFPE              |                           |             |
| Hotspot Ladder 5 (29.46%)     | FFPE              |                           |             |
| <b>reproducibility</b>        | 1                 | QM                        | FFPE        |
| <b>Interference</b>           | 1                 | RM8398 with 20% EtOH      | DNA         |
|                               |                   | RM8398 with 10% EtOH      | DNA         |
|                               |                   | RM8398 with 5% EtOH       | DNA         |
|                               |                   | RM8398 with 1% EtOH       | DNA         |
|                               |                   | RM8398                    | DNA         |
| <b>Specificity</b>            | 1                 | RM8398                    | DNA         |

Table S1B. Samples used for assessing the performance of OCP assay for detection of fusions

| Validation                             | Number of Samples | Sample Name            | Sample Type |
|----------------------------------------|-------------------|------------------------|-------------|
| <b>LLOD and Analytical sensitivity</b> | 44                | B903061                | FFPE        |
|                                        |                   | B903062                | FFPE        |
|                                        |                   | B903063                | FFPE        |
|                                        |                   | B903064                | FFPE        |
|                                        |                   | B903065                | FFPE        |
|                                        |                   | B903067                | FFPE        |
|                                        |                   | HD231 (50%)            | FFPE        |
|                                        |                   | HD231 (20%)            | FFPE        |
|                                        |                   | HD231 (10%)            | FFPE        |
|                                        |                   | HD231 (5%)             | FFPE        |
|                                        |                   | HD231 (2.5%)           | FFPE        |
|                                        |                   | HD231 (1%)             | FFPE        |
|                                        |                   | HD640 (22%)            | FFPE        |
|                                        |                   | HD640 (10%)            | FFPE        |
|                                        |                   | HD640 (5%)             | FFPE        |
|                                        |                   | HD640 (2.5%)           | FFPE        |
|                                        |                   | HD640 (1%)             | FFPE        |
|                                        |                   | HD615 (63%)            | FFPE        |
|                                        |                   | HD615 (45%)            | FFPE        |
|                                        |                   | HD615 (30%)            | FFPE        |
|                                        |                   | HD615 (10%)            | FFPE        |
|                                        |                   | HD615 (5%)             | FFPE        |
|                                        |                   | HD615 (2.5%)           | FFPE        |
|                                        |                   | CDX256                 | FFPE        |
|                                        |                   | CDX259                 | FFPE        |
|                                        |                   | CDX318                 | FFPE        |
|                                        |                   | Vcap (100%)            | FFPE        |
|                                        |                   | Vcap (80%)             | FFPE        |
|                                        |                   | Vcap (70%)             | FFPE        |
|                                        |                   | Vcap (60%)             | FFPE        |
|                                        |                   | Vcap (50%)             | FFPE        |
|                                        |                   | Vcap (40%)             | FFPE        |
|                                        |                   | Vcap (30%)             | FFPE        |
|                                        |                   | Vcap (15%)             | FFPE        |
|                                        |                   | Vcap (10%)             | FFPE        |
|                                        |                   | Vcap (5%)              | FFPE        |
|                                        |                   | Vcap (2.5%)            | FFPE        |
|                                        |                   | Vcap (1%)              | FFPE        |
|                                        |                   | HDx RNA multiplex 100% | FFPE        |
|                                        |                   | HDx RNA multiplex 80%  | FFPE        |
|                                        |                   | HDx RNA multiplex 60%  | FFPE        |
|                                        |                   | HDx RNA multiplex 30%  | FFPE        |
|                                        |                   | HDx RNA multiplex 15%  | FFPE        |
|                                        |                   | HDx RNA multiplex 5%   | FFPE        |
| <b>reproducibility</b>                 | 2                 | HD640 (2.5%)           | FFPE        |
|                                        |                   | HDx RNA multiplex 15%  | FFPE        |
| <b>Interference</b>                    | 2                 | HD615 (63%) 20% EtOH   | FFPE        |
|                                        |                   | HD615 (63%) 10% EtOH   | FFPE        |
|                                        |                   | HD615 (63%) 5% EtOH    | FFPE        |
|                                        |                   | HD615 (63%) 1% EtOH    | FFPE        |
|                                        |                   | HD615 (63%)            | FFPE        |
|                                        |                   | RNA multiplex 20% EtOH | FFPE        |
|                                        |                   | RNA multiplex 10% EtOH | FFPE        |
|                                        |                   | RNA multiplex 5% EtOH  | FFPE        |
|                                        |                   | RNA multiplex 1% EtOH  | FFPE        |
|                                        |                   | RNA multiplex          | FFPE        |
| <b>Specificity</b>                     | 9                 | HD615 (63%)            | FFPE        |
|                                        |                   | B903061                | FFPE        |
|                                        |                   | B903062                | FFPE        |
|                                        |                   | B903063                | FFPE        |
|                                        |                   | B903064                | FFPE        |
|                                        |                   | B903065                | FFPE        |
|                                        |                   | B903067                | FFPE        |
|                                        |                   | HCC1143BL 100% DNA     | FFPE        |
|                                        |                   | HCC2218BL 100% DNA     | FFPE        |

Table 1C. Samples used for assessing the performance of OCP assay for detection of CNVs

| Validation                    | Number of Samples/<br>CNVs | Sample Name                | Sample Type | Expected CNVs                            |
|-------------------------------|----------------------------|----------------------------|-------------|------------------------------------------|
| <b>LLOD</b>                   | 2 samples/6 CNVs           | HCC1143/ HCC1143BL 100%/0% | FFPE        | CCND1(12), MYC (8), AKT1(11) and MDM2(9) |
|                               |                            | HCC1143/ HCC1143BL 80%/20% | FFPE        | CCND1(12), MYC (8), AKT1(11) and MDM2(9) |
|                               |                            | HCC1143/ HCC1143BL 50%/50% | FFPE        | CCND1(12), MYC (8), AKT1(11) and MDM2(9) |
|                               |                            | HCC1143/ HCC1143BL 40%/60% | FFPE        | CCND1(12), MYC (8), AKT1(11) and MDM2(9) |
|                               |                            | HCC1143/ HCC1143BL 30%/70% | FFPE        | CCND1(12), MYC (8), AKT1(11) and MDM2(9) |
|                               |                            | HCC1143/ HCC1143BL 20%/80% | FFPE        | CCND1(12), MYC (8), AKT1(11) and MDM2(9) |
|                               |                            | HCC2218/HCC2218BL 100%/0%  | FFPE        | ERBB2 (9), CDH1 (0)                      |
|                               |                            | HCC2218/HCC2218BL 80%/20%  | FFPE        | ERBB2 (9), CDH1 (0)                      |
|                               |                            | HCC2218/HCC2218BL 50%/50%  | FFPE        | ERBB2 (9), CDH1 (0)                      |
|                               |                            | HCC2218/HCC2218BL 40%/60%  | FFPE        | ERBB2 (9), CDH1 (0)                      |
|                               |                            | HCC2218/HCC2218BL 30%/70%  | FFPE        | ERBB2 (9), CDH1 (0)                      |
|                               |                            | HCC2218/HCC2218BL 20%/80%  | FFPE        | ERBB2 (9), CDH1 (0)                      |
| <b>Analytical sensitivity</b> | 36                         | B903060                    | FFPE        | Negative                                 |
|                               |                            | B903061                    | FFPE        | Negative                                 |
|                               |                            | B903062                    | FFPE        | Negative                                 |
|                               |                            | B903063                    | FFPE        | Negative                                 |
|                               |                            | B903064                    | FFPE        | Negative                                 |
|                               |                            | B903065                    | FFPE        | Negative                                 |
|                               |                            | B903067                    | FFPE        | Negative                                 |
|                               |                            | B903069                    | FFPE        | Negative                                 |
|                               |                            | HCC1143 100%               | fresh cell  | CCND1(12), MYC (8), AKT1(11) and MDM2(9) |
|                               |                            | HCC2218 100%               | fresh cell  | ERBB2 (9), CDH1 (0)                      |
|                               |                            | NA10985 100%               | fresh cell  | VHL(1)                                   |
|                               |                            | HCC1143/ HCC1143BL 100%/0% | FFPE        | CCND1(12), MYC (8), AKT1(11) and MDM2(9) |
|                               |                            | HCC1143/ HCC1143BL 80%/20% | FFPE        | CCND1(12), MYC (8), AKT1(11) and MDM2(9) |
|                               |                            | HCC1143/ HCC1143BL 50%/50% | FFPE        | CCND1(12), MYC (8), AKT1(11) and MDM2(9) |
|                               |                            | HCC1143/ HCC1143BL 40%/60% | FFPE        | CCND1(12), MYC (8), AKT1(11) and MDM2(9) |
|                               |                            | HCC1143/ HCC1143BL 30%/70% | FFPE        | CCND1(12), MYC (8), AKT1(11) and MDM2(9) |
|                               |                            | HCC1143/ HCC1143BL 20%/80% | FFPE        | CCND1(12), MYC (8), AKT1(11) and MDM2(9) |
|                               |                            | HCC2218/HCC2218BL 100%/0%  | FFPE        | ERBB2 (9), CDH1 (0)                      |
|                               |                            | HCC2218/HCC2218BL 80%/20%  | FFPE        | ERBB2 (9), CDH1 (0)                      |
|                               |                            | HCC2218/HCC2218BL 50%/50%  | FFPE        | ERBB2 (9), CDH1 (0)                      |
| HCC2218/HCC2218BL 40%/60%     | FFPE                       | ERBB2 (9), CDH1 (0)        |             |                                          |
| HCC2218/HCC2218BL 30%/70%     | FFPE                       | ERBB2 (9), CDH1 (0)        |             |                                          |
| HCC2218/HCC2218BL 20%/80%     | FFPE                       | ERBB2 (9), CDH1 (0)        |             |                                          |
| H1770/BL1770 50%/50% DNA      | FFPE                       | MYCN (13)                  |             |                                          |
| H1395/BL1395 50%/50% DNA      | FFPE                       | MCL1(10), MYC(10)          |             |                                          |

| Validation             | Number of Samples/<br>CNVs | Sample Name                                                   | Sample Type | Expected CNVs                                |
|------------------------|----------------------------|---------------------------------------------------------------|-------------|----------------------------------------------|
|                        |                            | NA05067/NA09216 50%/50% DNA                                   | FFPE        | CD274 (3), PDCD1LG2(3), CDKN2A (3), MYCN(1)  |
|                        |                            | NA14164/NA10985 50%/50% DNA                                   | FFPE        | RB1(1), VHL (1)                              |
|                        |                            | NA12606/NA14485 50%/50% DNA                                   | FFPE        | FLT3(3), BRCA2(3), RB1(3), FGFR1(3)          |
|                        |                            | BL1395 100% DNA                                               | FFPE        | Negative                                     |
|                        |                            | BL1770 100% DNA                                               | FFPE        | Negative                                     |
|                        |                            | NA20022/NA24385 50%/50% DNA                                   | FFPE        | PIK3CA (3), SOX2(3), ATP11B (3), DCUN1D1 (3) |
|                        |                            | HCC1143BL 100% DNA                                            | fresh cell  | negative                                     |
|                        |                            | HCC2218BL 100% DNA                                            | fresh cell  | negative                                     |
|                        |                            | NA10985 100%                                                  | FFPE        | VHL(1)                                       |
|                        |                            | HDx ERBB2 amplification FISH reference standard (HD-C511) DNA | DNA         | ERBB2 (16)                                   |
|                        |                            | HDx structural multiplex reference standard (HD753) DNA       | DNA         | MET (4.5), MYCN (9.5), MYC (9.8)             |
| <b>reproducibility</b> | 1                          | HDx Structural multiplex reference standard (HD753) DNA       | DNA         | MET (4.5), MYCN (9.5), MYC (9.8)             |
| <b>Interference</b>    | 1                          | HC-C511                                                       | DNA         | ERBB2 (16)                                   |
|                        |                            | HC-C511 1% EtOH                                               | DNA         | ERBB2 (16)                                   |
|                        |                            | HC-C511 5% EtOH                                               | DNA         | ERBB2 (16)                                   |
|                        |                            | HC-C511 10% EtOH                                              | DNA         | ERBB2 (16)                                   |
|                        |                            | HC-C511 20% EtOH                                              | DNA         | ERBB2 (16)                                   |
| <b>Specificity</b>     | 13                         | B903060                                                       | FFPE        | Negative                                     |
|                        |                            | B903061                                                       | FFPE        | Negative                                     |
|                        |                            | B903062                                                       | FFPE        | Negative                                     |
|                        |                            | B903063                                                       | FFPE        | Negative                                     |
|                        |                            | B903064                                                       | FFPE        | Negative                                     |
|                        |                            | B903065                                                       | FFPE        | Negative                                     |
|                        |                            | B903067                                                       | FFPE        | Negative                                     |
|                        |                            | B903069                                                       | FFPE        | Negative                                     |
|                        |                            | BL1395 100% DNA                                               | FFPE        | Negative                                     |
|                        |                            | BL1770 100% DNA                                               | FFPE        | Negative                                     |
|                        |                            | HCC1143BL 100% DNA                                            | fresh cell  | negative                                     |
|                        |                            | HCC2218BL 100% DNA                                            | fresh cell  | negative                                     |
|                        |                            | HDx Structural multiplex reference standard (HD753) DNA       | DNA         | MET (4.5), MYCN (9.5), MYC (9.8)             |
