# Supplementary material for: Validation and Clinical Applications of a Comprehensive Next Generation Sequencing System for Molecular Characterization of Solid Cancer Tissues
Source: PubMed Central journal article supplement (PMC6798036; doi:10.3389/fmolb.2019.00082), 2019-09-25
Supplement: Data_Sheet_2.pdf [file Data_Sheet_2.pdf]

Table S2. Primers and Probes used in this study

| Target                           | Primer sequence               | TaqMan probe sequence           | Reference/Taqman Assay ID |
|----------------------------------|-------------------------------|---------------------------------|---------------------------|
| <i>EGFRvIII</i>                  | Forward: CGGGCTCTGGAGGAAAAG   | 6FAM-GTGACAGATCACGGCTCGT-MGBNFQ | PMID: 22323597            |
|                                  | Reverse: AGGCCCTTCGCACTTCTTAC |                                 |                           |
| <i>TMPRSS2-ERG_T2E4 (COSF28)</i> | N/A                           | N/A                             | Hs04396364_ft             |
| <i>GAPDH</i>                     | N/A                           | N/A                             | Hs03929097_g1             |
