# Supplementary material for: Validation and Clinical Applications of a Comprehensive Next Generation Sequencing System for Molecular Characterization of Solid Cancer Tissues
Source: PubMed Central journal article supplement (PMC6798036; doi:10.3389/fmolb.2019.00082), 2019-09-25
Supplement: Data_Sheet_13.pdf [file Data_Sheet_13.pdf]

Table S13. Ethanol interference impact on library concentration

| <b>DNA Sample</b>       | <b>[Library] (pM)</b> | <b>RNA Sample</b>      | <b>[Library] (pM)</b> |
|-------------------------|-----------------------|------------------------|-----------------------|
| <b>RM8398 20% EtOH</b>  | 5.0                   | HD615 (63%) 20% EtOH   | 8.8                   |
| <b>RM8398 10% EtOH</b>  | 4.0                   | HD615 (63%) 10% EtOH   | 2,029.6               |
| <b>RM8398 5% EtOH</b>   | 126.6                 | HD615 (63%) 5% EtOH    | 3,825.0               |
| <b>RM8398 1% EtOH</b>   | 1,055.8               | HD615 (63%) 1% EtOH    | 3,508.2               |
| <b>RM8398- Clean</b>    | 1,042.0               | HD615 (63%)            | 3,448.2               |
| <b>HC-C511 20% EtOH</b> | 3.6                   | RNA multiplex 20% EtOH | 2.0                   |
| <b>HC-C511 10% EtOH</b> | 55.6                  | RNA multiplex 10% EtOH | 1.6                   |
| <b>HC-C511 5% EtOH</b>  | 715.2                 | RNA multiplex 5% EtOH  | 36.8                  |
| <b>HC-C511 1% EtOH</b>  | 2,923.2               | RNA multiplex 1% EtOH  | 1,611.2               |
| <b>HC-C511</b>          | 3,307.6               | RNA multiplex          | 762.4                 |
