# Supplementary material for: Validation and Clinical Applications of a Comprehensive Next Generation Sequencing System for Molecular Characterization of Solid Cancer Tissues
Source: PubMed Central journal article supplement (PMC6798036; doi:10.3389/fmolb.2019.00082), 2019-09-25
Supplement: Image_1.pdf [file Image_1.pdf]

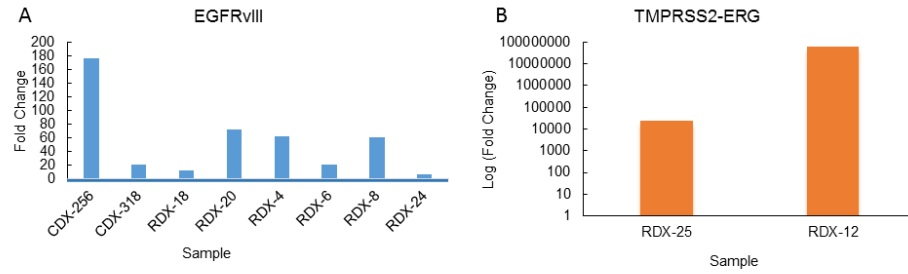

**Figure S1.** Confirmation of *EGFRvIII* (A) and *TMPRSS2-ERG* (B) fusion detected by the OCAv1 in solid tumor samples using TaqMan qRT-PCR fusion assays. Relative expression of fusion transcripts was quantified by the  $\Delta\Delta C_t$  method using *GAPDH* as a reference and a negative sample without fusions as the calibrator and is shown as fold changes (A) or  $\log_{10}(\text{fold change})$  (B). Replicates of experiments were performed when sufficient RNA was available.
